# Supplementary material for: T cell self-reactivity during thymic development dictates the timing of positive selection
Source: eLife. 2021 Apr 22;10:e65435. doi: 10.7554/eLife.65435 (PMC8116051; doi:10.7554/eLife.65435)
Supplement: Supplementary file 1. — Percent time signaling was calculated by dividing the number of signaling time points by total time points. [file elife-65435-supp1.xlsx]

## Sheet: Sheet1
	TG6 3h	OT-1 3h	TG6 6h	OT-1 6h
Total Signaling Timepoints	172	409	177	163
Total Timepoints	16928	21973	32367	14553
Percent Time Signaling	1.01607	1.86138	0.546853	1.12004
Total Signaling Events	42	61	44	32
Cumulative Track Imaging Time (h)	47.022	61.036	89.908	40.425
Signaling Events/Hour	0.893	0.999	0.489	0.792
