# Supplementary material for: T cell self-reactivity during thymic development dictates the timing of positive selection
Source: eLife. 2021 Apr 22;10:e65435. doi: 10.7554/eLife.65435 (PMC8116051; doi:10.7554/eLife.65435)
Supplement: Supplementary file 2. — The frequency of signaling events was calculated by dividing the total number of signaling events by the cumulative track imaging time (the sum of all of the track durations for all runs) for each condition. [file elife-65435-supp2.xlsx]

## Sheet: Sheet1
	TG6 3h	OT-1 3h	TG6 6h	OT-1 6h
Average Speed of Ca hi timepoints	38.98	34.2	40.25	39
Average Speed of Ca lo timepoints	49.68	51.63	43.1	57.35
