# Supplementary material for: T cell self-reactivity during thymic development dictates the timing of positive selection
Source: eLife. 2021 Apr 22;10:e65435. doi: 10.7554/eLife.65435 (PMC8116051; doi:10.7554/eLife.65435)
Supplement: Supplementary file 3. — The top 47 significantly different (p<0.05, >1.45-fold difference) genes upregulated in sorted CD5lo naive polyclonal CD8SP T cells, by microarray analysis, and ranked by their expression (fold) difference. Gene that appear multiple times represent multiple probe sets for the same gene, and a number in the left-most column is included only for the first listing. Genes of interest, Kcna2 and Tmie, are in bold. Data was analyzed by Fulton et al.(GSE62142). [file elife-65435-supp3.xlsx]

## Sheet: Table
Rank	Gene	Expression (fold)	P value
1	Dntt	9.27102	0.0110037
2	Slc6a19	4.17956	0.00247416
	Slc6a19	4.09516	0.0142836
3	Slc16a5	2.79011	0.0257159
4	Ddc	2.55311	0.0034578
5	A130038J17Rik	2.29848	0.0174892
6	Grik4	2.19537	0.0033686
7	Tmem154	2.10321	0.032241
8	4930513N10Rik	2.08434	0.0453214
9	Tubb2a	2.03407	0.0200272
10	Itk	2.0133	0.0411216
11	Tmie	1.99501	0.0384751
12	Nipa1	1.96676	0.0217934
13	Sc4mol	1.95991	0.0425139
14	D14Abb1e	1.95502	0.0236209
15	Akap13	1.89029	0.00621603
16	A130004G07Rik	1.87812	0.00280968
17	Bambi-ps1	1.86302	0.0182024
18	ENSMUSG00000074335 (Kcna2)	1.85913	0.0208945
19	Art4	1.80939	0.0367444
20	Ccr9	1.78148	0.00181505
21	D5Wsu152e	1.77866	0.00796668
22	Satb1	1.71302	0.024097
23	Tsepa	1.70466	0.0286969
24	Smarca5	1.69762	0.00551151
25	Pvr	1.68694	0.0100427
26	Arhgef6	1.68517	0.0252037
27	Scfd1	1.67255	0.0291045
28	Gpr97	1.66355	0.021059
29	Tmem136	1.66318	0.017585
30	Morc3	1.66233	0.00625861
31	Vps35	1.65816	0.00825911
32	Dstyk	1.64783	0.0313225
33	Tbrg3	1.6416	0.00782981
34	Socs3	1.63448	0.0311673
35	Frmd4b	1.62962	0.00263701
36	A130091K22Rik	1.62724	0.0207419
37	Senp6	1.62008	0.0287063
38	Dnajc6	1.61605	0.0234775
39	Avl9	1.61319	0.00601845
	Ccr9	1.6096	0.00769087
40	Dennd5a	1.6063	0.0317357
41	AI854517	1.60584	0.0350232
42	Jun	1.60331	0.0302151
43	Pacs2	1.6009	0.0253441
	Tmie	1.59706	0.0177285
44	Ntrk3	1.58501	0.0104383
45	Rrad	1.57803	0.0103306
46	BC065397	1.5761	0.0379371
47	1700019D03Rik	1.56742	0.000162
