# Supplementary material for: T cell self-reactivity during thymic development dictates the timing of positive selection
Source: eLife. 2021 Apr 22;10:e65435. doi: 10.7554/eLife.65435 (PMC8116051; doi:10.7554/eLife.65435)
Supplement: Supplementary file 4. — The top 51 significantly different (padj<0.05) upregulated genes in sorted CD5lo naive polyclonal CD8+T cells and ranked by their expression (fold) difference, from the Matson et al. RNA-seq dataset (GSE151395). Genes of interest, Kcna2 and Tmie, are in bold. Data was analyzed by DEseq2. [file elife-65435-supp4.xlsx]

## Sheet: up in CD8 CD5 lo
Rank	Gene	Expression (fold)	padj
1	Col2a1	5.95326	7.25367e-05
2	Irs1	5.91356	0.000667665
3	Meg3	5.86823	0.0258276
4	Col9a2	4.81442	0.0112916
5	Igf2	4.28159	0.00117279
6	Lect1	4.25203	0.0105847
7	P3h3	3.99517	0.039889
8	Mir6934	3.6197	0.0265489
9	Thbs1	3.61051	0.0301042
10	Pcsk1	3.52201	2.74101e-07
11	5930430L01Rik	3.34617	4.95322e-05
12	Slc6a19	3.19936	3.38714e-14
13	Col12a1	3.1233	0.0128949
14	Grm6	3.004	6.57663e-10
15	Dntt	2.93947	3.82716e-21
16	Lrrc3b	2.93265	1.07668e-05
17	Adamts14	2.67194	7.45327e-21
18	Tdrd5	2.54729	5.09847e-06
19	Zfp36l3	2.52352	0.0489461
20	Nrg2	2.29592	0.00222034
21	Fbxl21	2.22446	0.000216516
22	Kcnj16	2.19963	4.85276e-06
23	Btc	2.17064	0.0160277
24	Islr	2.14123	5.34141e-12
25	Slc6a19os	2.09378	7.51048e-07
26	P4ha2	2.00866	5.01312e-09
27	Nphs2	1.97501	0.00070278
28	A130077B15Rik	1.96012	4.63274e-06
29	4930447K03Rik	1.94458	0.026949
30	Fbln2	1.91985	4.57872e-05
31	Arpp21	1.90557	6.48696e-07
32	Osgin1	1.89064	1.61336e-09
33	Gpr34	1.88837	1.49684e-05
34	4930512J16Rik	1.81568	0.0443115
35	Pomgnt2	1.81279	0.00294935
36	Slc16a5	1.71563	5.13086e-29
37	Cyp2s1	1.69884	1.19107e-13
38	Dmbt1	1.64608	1.76465e-18
39	Slc6a9	1.60789	0.0141411
40	Gm10516	1.60565	0.0183768
41	Prdm1	1.52882	9.84251e-08
42	Prss50	1.5241	0.00391003
43	Ntn5	1.51499	0.0441897
44	Rmrp	1.48249	0.00212812
45	Tmie	1.47328	0.000408141
46	Igsf23	1.46886	4.60803e-15
47	Smyd1	1.42335	0.00103415
48	Zp3r	1.40949	0.0180675
49	Angptl2	1.40699	3.47187e-06
50	Bmf	1.38489	2.9982e-07
51	Kcna2	1.35256	1.91621e-13
