# Supplementary figures and images for: T cell self-reactivity during thymic development dictates the timing of positive selection
Source: eLife journal article supplement (doi:10.7554/elife.65435), 2021-04-22

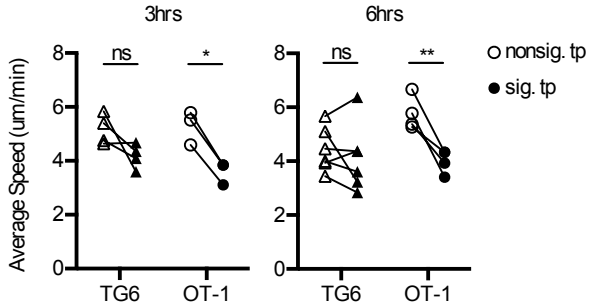

Figure 2--figure supplement 2

Supplement: supp [file elife-65435-supp-v1.zip]

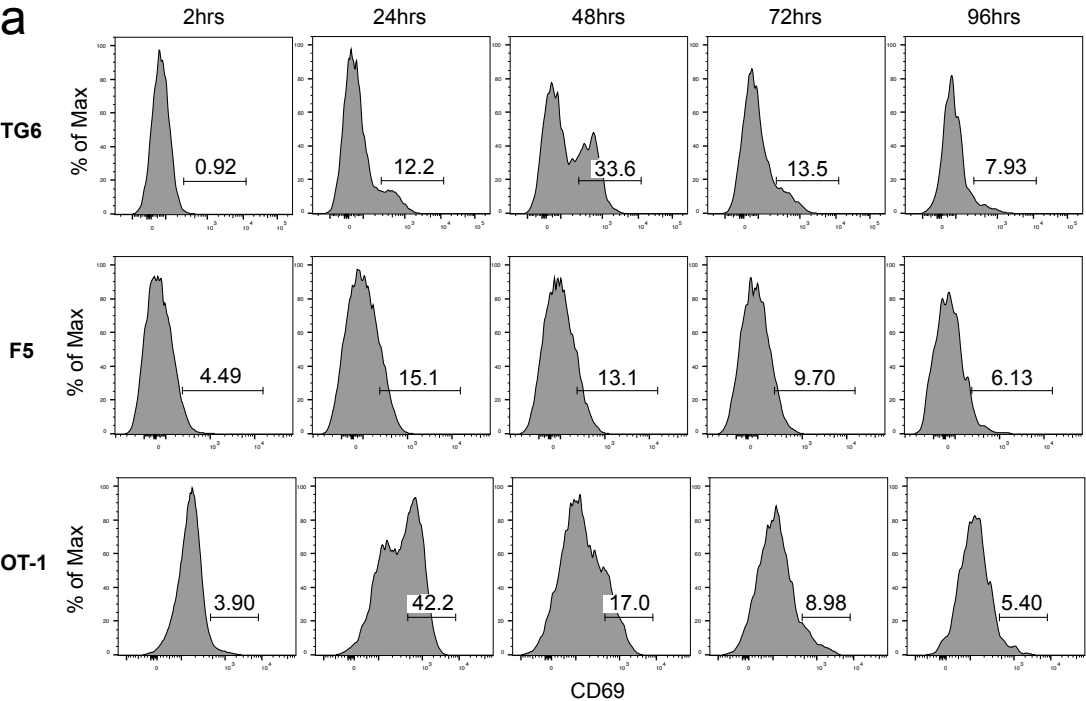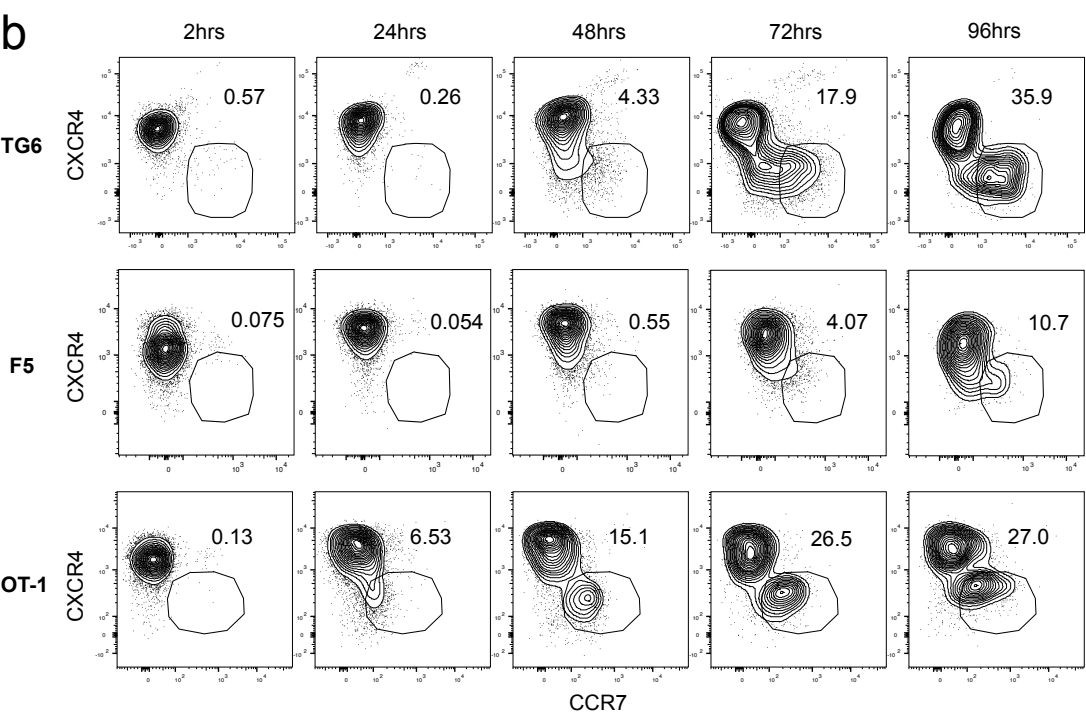

Figure 3--figure supplement 2

Supplement: supp [file elife-65435-supp-v1.zip]

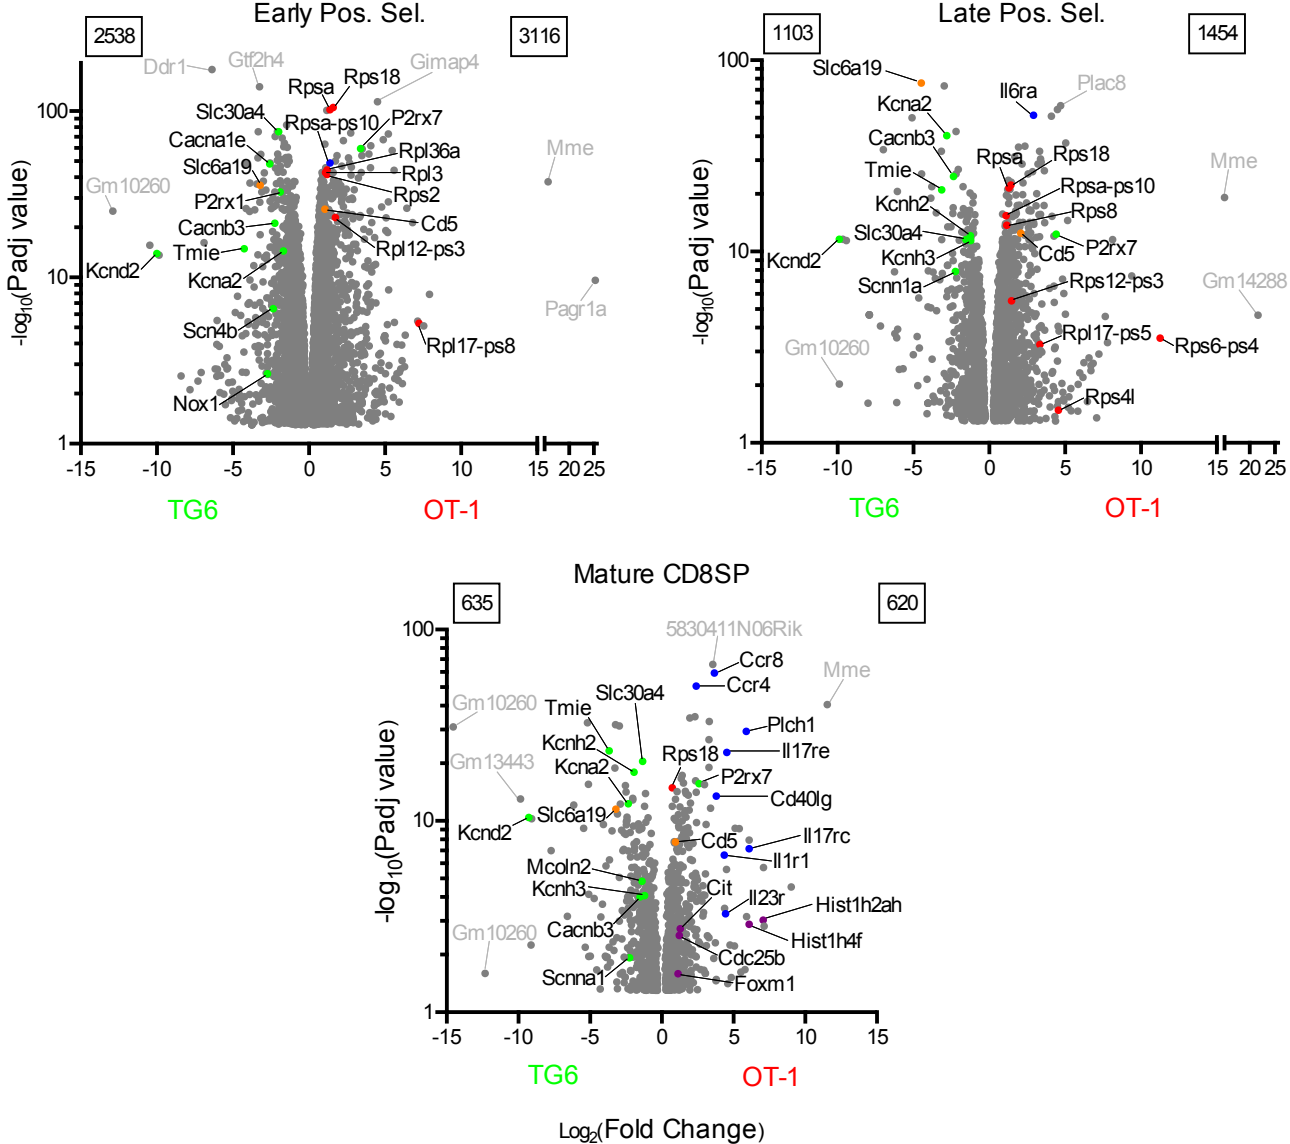

Figure 6--figure supplement 1

Supplement: supp [file elife-65435-supp-v1.zip]

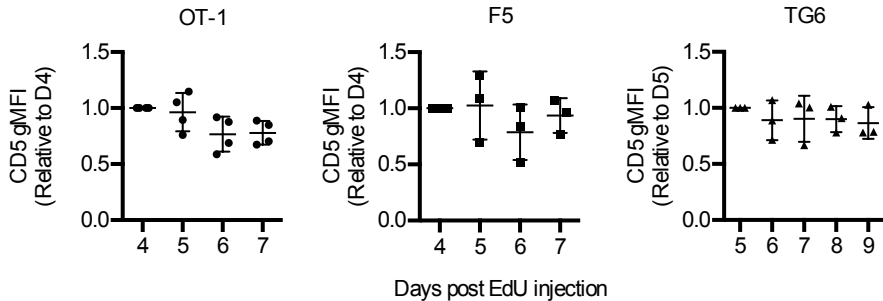

Figure 5--figure supplement 1

Supplement: supp [file elife-65435-supp-v1.zip]

**a**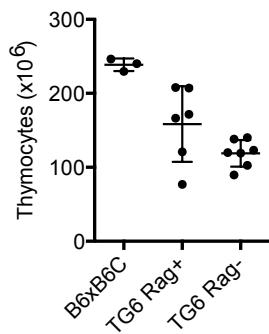**b**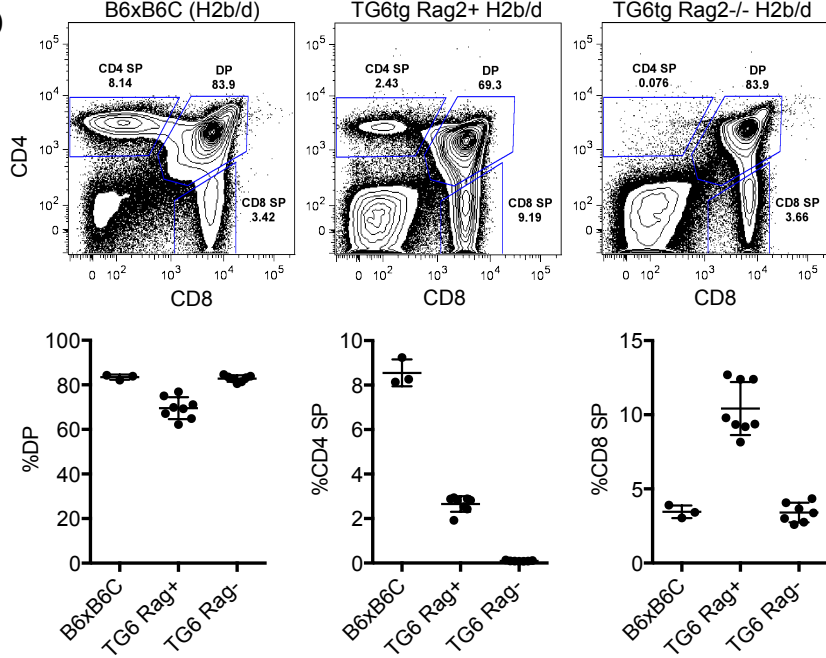**c**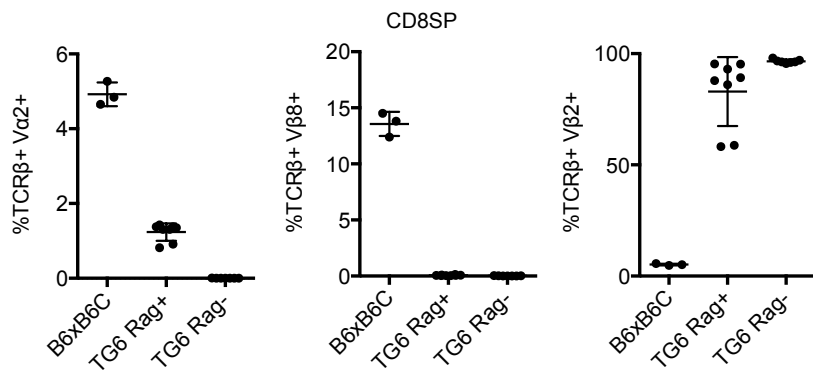

Figure 1--figure supplement 1

Supplement: supp [file elife-65435-supp-v1.zip]

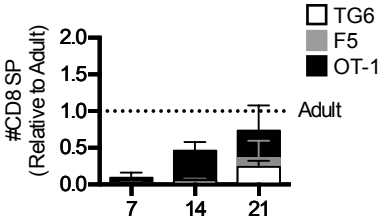

Figure 4--figure supplement 1

Supplement: supp [file elife-65435-supp-v1.zip]

**a**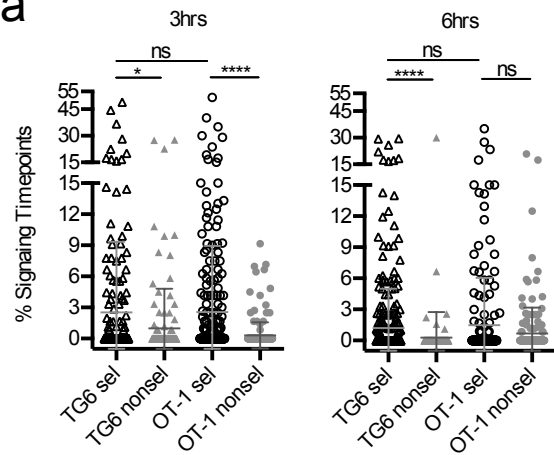**b**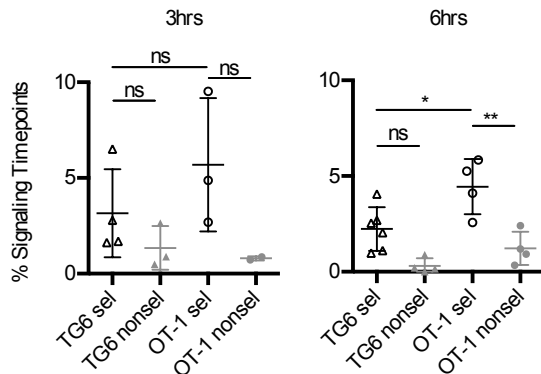**c**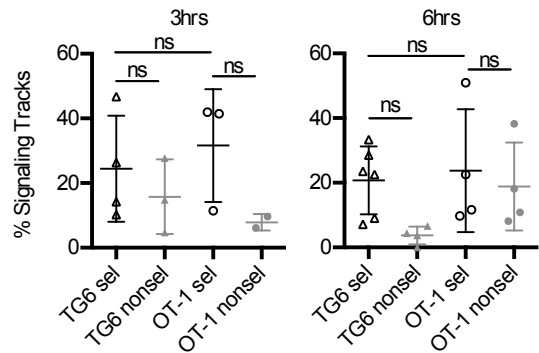

Figure 2--figure supplement 1

Supplement: supp [file elife-65435-supp-v1.zip]

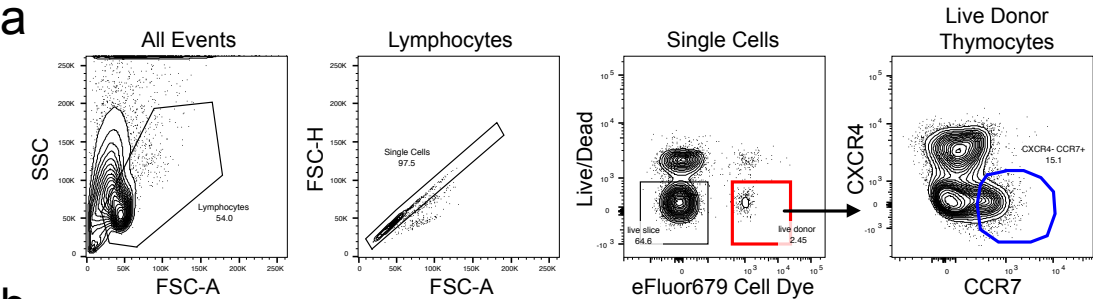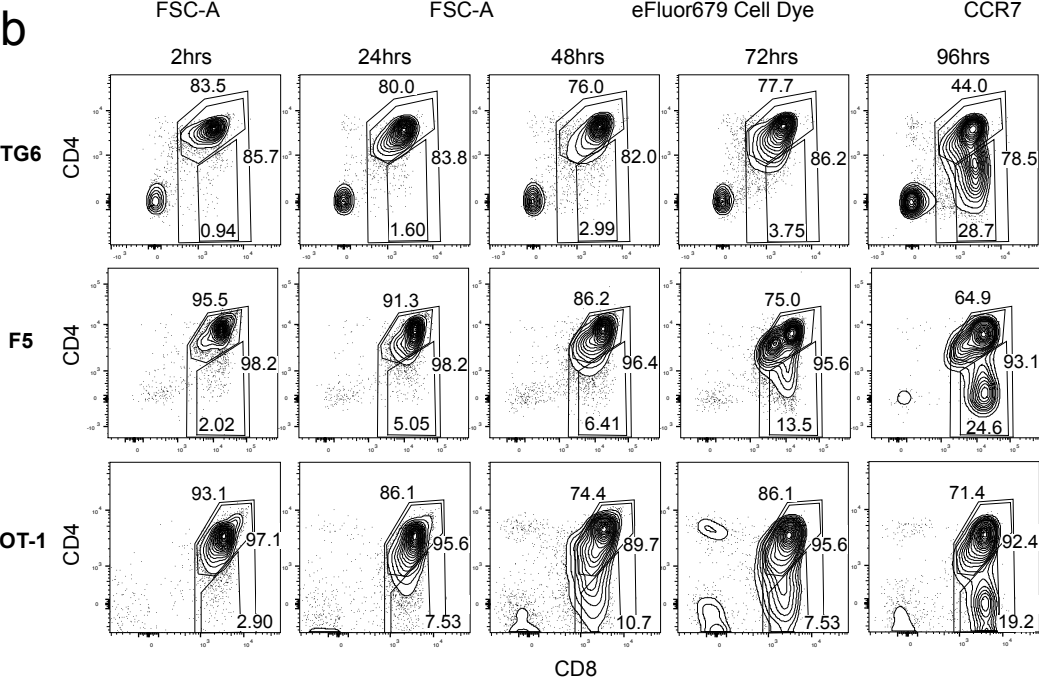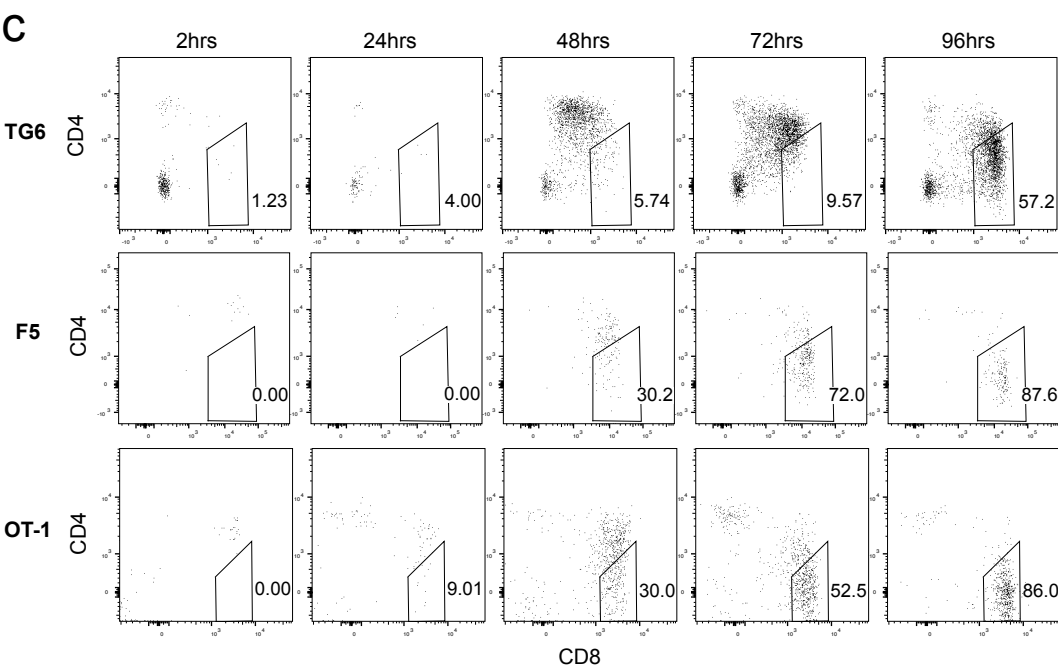

Figure 3--figure supplement 1

Supplement: supp [file elife-65435-supp-v1.zip]

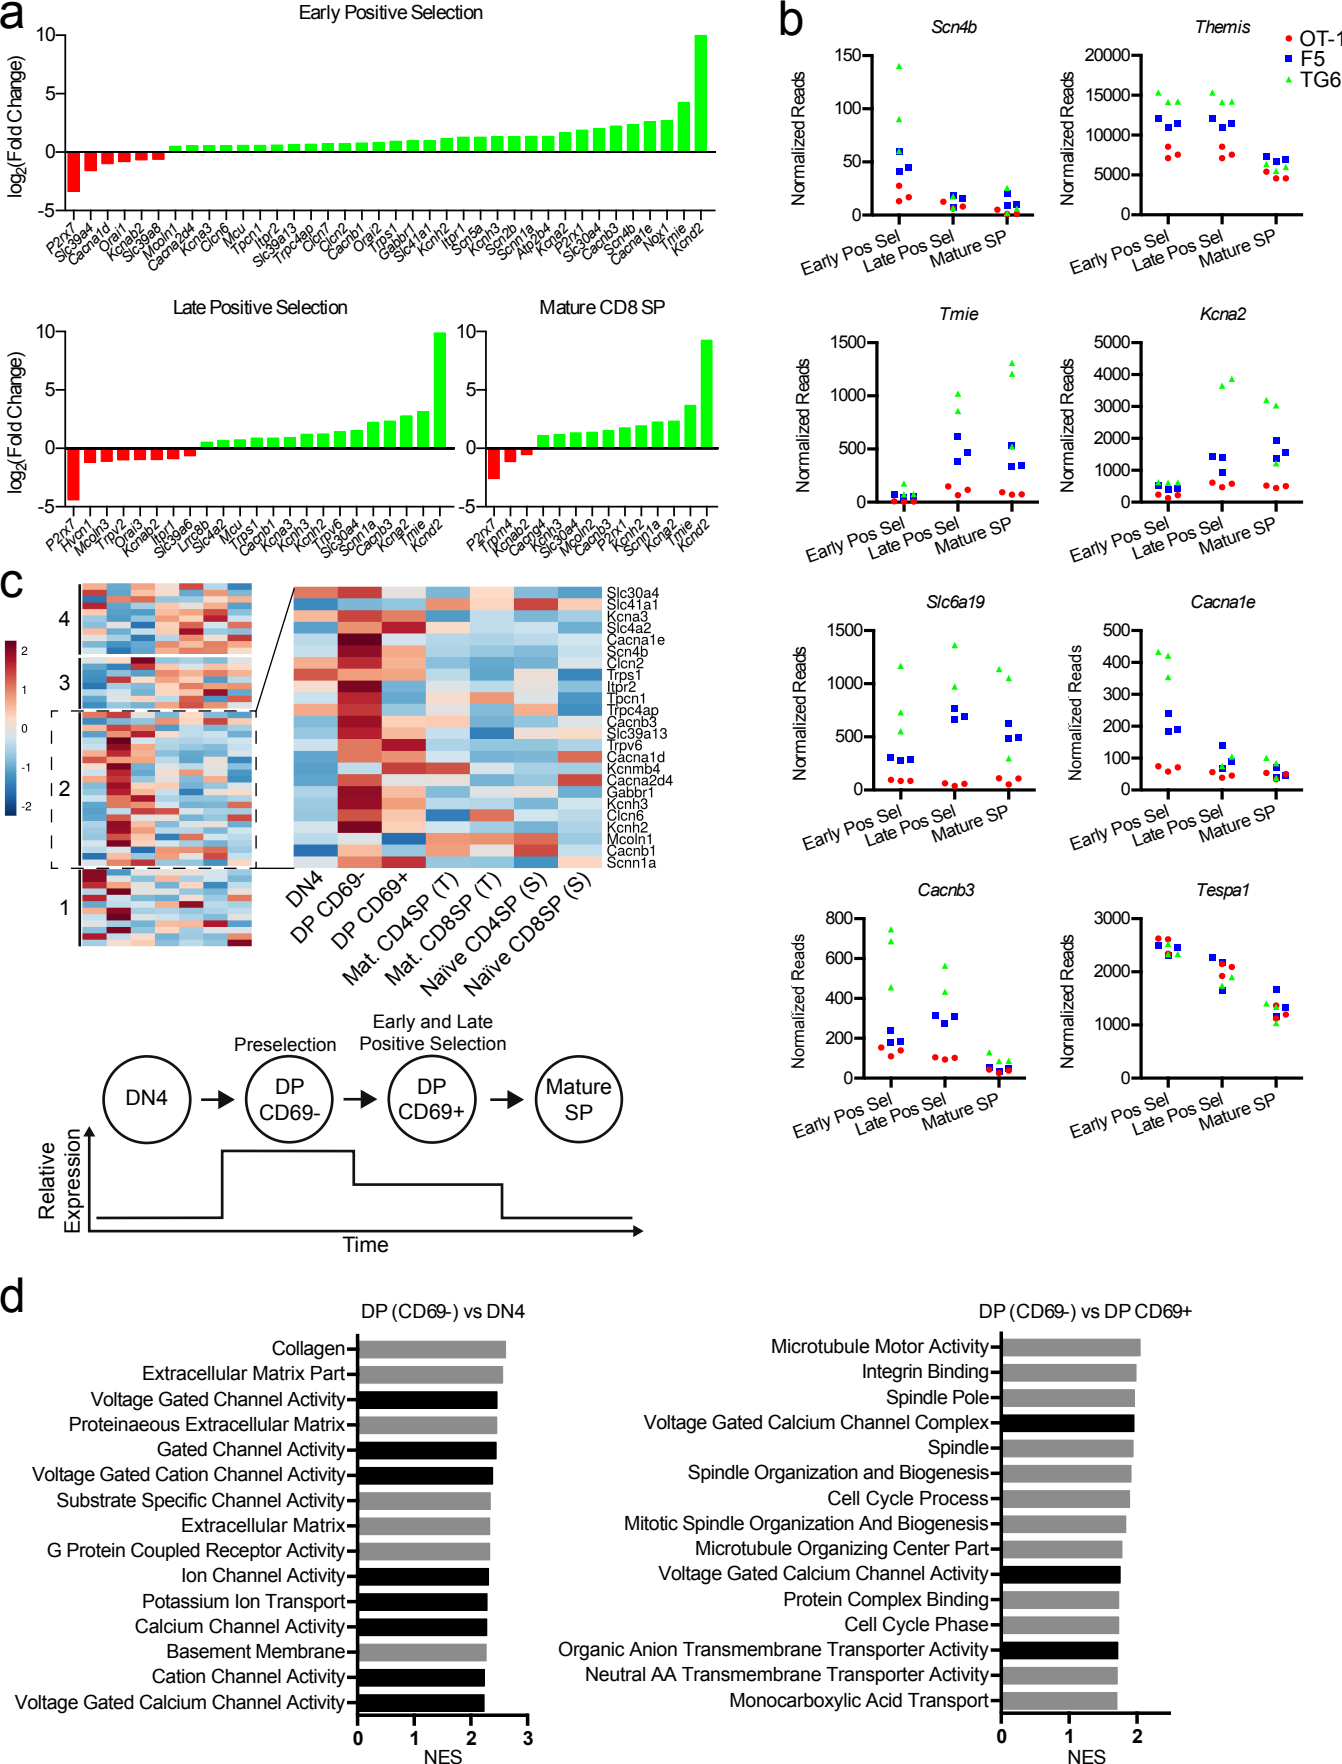

Figure 6--figure supplement 2

Supplement: supp [file elife-65435-supp-v1.zip]
